# Supplementary material
Source: Research Square preprint supplement (doi:10.21203/rs.3.rs-9500239/v1)
Supplement: Supplementary file 1 [file 3cc54020b65146f945fe7bcc.docx]

Pre-Tampon Training Group:

The questionnaire is being filled out by:

Name: Age: _________

Special Considerations:

**Preparing for use of a tampon:**

Have you started having periods? Yes No

Do you know what a tampon is? **Yes No**

1. Do you feel ready to use a tampon: **Yes No Maybe**
2. Do you think you will start using a tampon during your next period? **Yes No Maybe**
3. Who or what introduced you to using a tampon?
4. Why do you want to start using a tampon?
5. How do you like to learn new things? (Circle all that apply)
   1. Written instructions
   2. Videos
   3. Practice
   4. Talking to friends, family, teachers, coaches
6. What are the feelings you have about using a tampon?

**Self-Care Questions:**

Do you think you will be successful with using a tampon independently: **Yes No**

Why?

1. Are you independent with the following (circle yes/no)
   - Showering
     1. **Yes** No Comments:
   - Toileting
     1. **Yes No** Comments: ______
   - Dressing
     1. **Yes No** Comments:
   - Current management of period
     1. **Yes No** Comments: ______

How motivated are you to start to use a tampon?


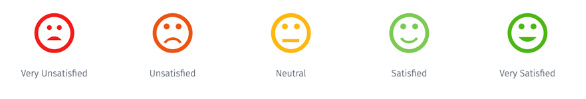


0_________________3_________________5_________________8______________________10

Not motivated Somewhat motivated Very Motivated
