# Supplementary material
Source: Research Square preprint supplement (doi:10.21203/rs.3.rs-9500239/v1)
Supplement: Supplementary file 2 [file b7455f9fac064f272f152b32.docx]

Post-Tampon Training Group:

The questionnaire is being filled out by:

Tampon user:

Age:

Special Considerations:

**Preparing for use of a tampon:**

1. Do you know what a tampon is? **Yes No**
2. Do you feel ready to use a tampon: **Yes No Maybe**
3. Do you think you will start using a tampon at your next period? **Yes No Maybe**
4. Do you think you will try using a tampon within the next year? **Yes No Maybe**

**Tampon Training Sessions:**

Do you think you will be successful with using a tampon independently: **Yes No**

Why?

What parts of today’s training session did you find the most helpful?

_____________________________________________________________________________________________

What would you like more information on regarding using a tampon?

_________________________________________________________________________________________

Will you be seeking help from another person before trying to use a tampon? **Yes No Maybe**

__________________________________________________________________________________________________________________________________________________________________________Will you be consulting the pictures and practice before using a tampon? **Yes No Maybe**

How motivated are you to start to use a tampon 0-10?


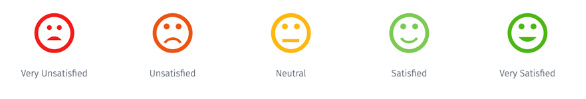


0_________________3_________________5_________________8______________________10
